# Supplementary material
Source: PubMed Central journal article supplement (PMC4319876)
Supplement: hesr0050-0161-sd1.pdf [file hesr0050-0161-sd1.pdf]

**Health Services Research**  
**COPYRIGHT ASSIGNMENT FORM**

This Agreement is made with The Health Research and Educational Trust for the Article ("Article") submitted by you ("Author") for publication in *Health Services Research* ("the Journal") published by Blackwell Publishing, Inc. on behalf of The Health Research and Educational Trust.

To enable Blackwell Publishing to publish the Article in the Journal, the ownership of copyright must be established. Please read and complete the form below (Section A plus Section B or C, as appropriate) and return one copy to the address given below. There are explanatory notes to this Agreement, which also form part of the Agreement.

**The Article cannot be published until this signed Agreement is received by the Journal.**

**SECTION A: Author's Warranty** (Please PRINT your details)

Name: MOMOTAZUR RAHMAN  
Address: BOX - 9 S121(G) PROVIDENCE RI-02912

HSR Manuscript ID: HSR-13-0628

Article title (or provisional Article title): Higher Medicare SNF care utilization by dual eligible beneficiaries: can Medicaid policies be the answer

Names of all authors in the order in which they appear in the Article: Momotazur Rahman, Denise Tyler, Kali S Thomas, David C Grabowski, Vincent Mor

Please check any that apply:

- I am or was a U.S. government employee, and the article is made in that capacity (please see Note 10).
- I am or was a U.K., Canadian, or Australian government employee, and the article is made in that capacity (please see Note 10).

In consideration of the publication of the Article in the above Journal, I hereby warrant and undertake:

- a. that this Article is an original work, has not been published before, and is not being considered for publication elsewhere in its final form either in printed or electronic form.
- b. that I have obtained permission from the copyright holder to reproduce in the Article (in all media including print and electronic form) material not owned by me, and that I have acknowledged the source;
- c. that this Article contains no violation of any existing copyright or other third party right or any material of an obscene, indecent, libelous, or otherwise unlawful nature, and that to the best of my knowledge this Article does not infringe the rights of others;
- d. that I will indemnify and keep indemnified the Editors, The Health Research and Educational Trust, and Blackwell Publishing against all claims and expenses (including legal costs and expenses) arising from any breach of this warranty and the other warranties on my behalf in this Agreement;
- e. that in the case of a multi-authored Article I have obtained copyright assignment from all co-authors, in writing, a copy of which is attached, to enter into this Agreement on their behalf and to bind them to it, and that all co-authors have read and agreed the above warranties;

**SECTION B: Copyright Assignment**

In consideration of the publication of the Article in the Journal, I hereby assign to The Health Research and Educational Trust copyright for the full period of copyright and all renewals, extensions, revisions and revivals together with all accrued rights of action throughout the world in any form and in any language (including all media, both now known or later developed). The Health Research and Educational Trust may assign its rights under this Agreement.

Notwithstanding the above, I retain all proprietary rights other than copyright, such as patent and trade mark rights and rights to any process or procedure described in the Article.

Full detail regarding the assignment of copyright, the management of permissions, and what rights are granted back to the authors can be found on the accompanying Notes, which you agree are fully incorporated into, and form part of, this Agreement.

AGREED:

Author: Signed: Md. Momotazur Rahman Date: 5/6/14

In signing this form, the signor warrants that any authors not signing have granted the signor the power of attorney to do so on their behalf, and that the manuscript submitted has been approved by these authors in the form in which it has been submitted, and that the warranties given above have been read and agreed by all authors.

**SECTION C: If copyright in the Article is owned by someone other than the Author**

I hereby grant The Health Research and Educational Trust non-exclusive rights to reproduce and/or distribute this Article (in full or in part) and to publish the same throughout the world in any format and in all languages including without limitation in printed, electronic or other medium on optical disk, transmission over the internet and other communication networks and in any other electronic form, and to authorize others (including reproduction rights organizations such as the Copyright Clearance Center and the Copyright Licensing Agency) to do the same. The Health Research and Educational Trust may assign its rights under this Agreement.

Title of copyright holder: .....

This will be printed on the copyright line on each page of the Article. It is the Author's responsibility to provide the correct information of the copyright holder.

Signed on behalf of copyright holder: ..... Date: .....

Title/position/address: .....

.....

In signing this form, the signor warrants that the manuscript submitted has been approved by all authors in the form in which it has been submitted, and that the warranties given above have been read and agreed by all authors.

**Data Protection**

The Publisher may store your name and contact details in electronic format in order to correspond with you about the publication of your article in the journal. We would like to contact you from time to time with information about new Blackwell publications and services in your subject area. (For European contributors, this may involve transfer of your personal data outside the European Economic Area). If you do not wish to be contacted in this way, please check this box:

Author

**PLEASE RETURN A SIGNED COPY OF THIS FORM TO:**

Meighan Schreiber, M.S.S.A., Managing Editor  
Health Research & Educational Trust (HRET)  
American Hospital Association (AHA)  
155 N. Wacker Dr., Suite 400  
Chicago, IL 60606

## NOTES ON THE ASSIGNMENT OF COPYRIGHT

### *Why do we ask for copyright to be assigned?*

- 1 The policy of Blackwell Publishing (acting as agent for The Health Research and Educational Trust) is to acquire copyright for all Articles. The reasons for this are:
  - (a) ownership of copyright by one central organization facilitates international protection against infringement, libel, or plagiarism;
  - (b) it enables the most efficient processing of permissions and licensing in order that the Article can be made available to the fullest extent both directly and through intermediaries, and in both print and electronic form;
  - (c) it enables Blackwell Publishing to maintain the integrity of an Article once refereed and accepted for publication, by facilitating centralized management of all media forms including linking, reference validation, and distribution.

### *What rights does the author retain?*

- 2 The author retains his or her rights in the Article including the right to be identified as the author whenever and wherever the Article is published. We will make sure that your name and the name(s) of your co-author(s) is/are always clearly associated with the Article and, while you do allow us to make necessary editorial changes, we will not make any substantial alteration to the Article without consulting you. When the Article is accepted, we undertake to publish it as soon as we reasonably can. If it is rejected, this Agreement is automatically cancelled and all the rights come back to you.
- 3 In addition to the rights stated above the author shall retain the following rights:
  - (a) The right, after publication by Blackwell Publishing, to use all or part of the Article and abstract, without revision or modification, in personal compilations or other publications of the author's own works, and to make copies of all or part of such materials for the author's use for lecture or classroom purposes (excluding the preparation of course pack material for onward sale by libraries and institutions), provided that the first page of such use or copy prominently displays the bibliographic data and the following copyright notice: '© [year] The Health Research and Educational Trust.'
  - (b) Prior to publication, the author may share with colleagues print or electronic 'preprints' of the unpublished Article, in form and content as accepted by Blackwell Publishing for publication in the Journal. Such preprints may be posted as electronic files on the author's own website for personal or professional use, or on the author's internal university, college or corporate networks/intranet, or secure external website at the author's institution, but not for commercial sale or for any systematic external distribution by a third party (e.g., a listserv or database connected to a public access server). Prior to publication, the author must include the following notice on the preprint. 'This is a preprint of an Article accepted for publication in *Health Services Research* © [year] The Health Research and Educational Trust.'
  - (c) After publication of the Article by Blackwell Publishing, the preprint notice shall be amended to read as follows: 'This is an electronic version of an Article published in *Health Services Research*,' and shall include the complete citation information for the final version of the Article as published in the print edition of the *Health Services Research*. The author agrees not to update the preprint or replace it with the published version of the Article without first seeking permission from Blackwell Publishing. Posting of the published Article on an electronic public server can only be done with written permission from Blackwell Publishing.
- 4 You may continue to use your Article solely as set forth in Note 3 above provided that the Journal is acknowledged as the original source.
- 5 Assignment of copyright in the Article does not infringe your other proprietary rights such as patent and trademark rights.

### *Permissions*

- 6 The author will receive 50% of all fees paid where permission is granted to any third party to re-typeset and reprint material in commercially published edited volumes in instances where the author's share of the fee exceeds \$60. In these cases the author's consent will be sought, which is assumed to have been given if we have not heard from him/her within thirty days of writing to the last known address. In the case of co-authorship, the first-named author will be contacted for consent, and fees for subsequent redistribution amongst their co-authors will be sent to them.
- 7 In addition to reproduction in conventional printed form the Article and the accompanying abstract may be stored electronically and then delivered electronically or in printed form to meet individual requests thus increasing exposure of the Article to the international community. This transfer includes the right to adapt the presentation of the Article for use in conjunction with computer systems and programs, including reproduction or publication in machine-readable form and incorporation in retrieval systems.
- 8 Should the copyright be held by someone other than the author, e.g., the author's employer, Blackwell Publishing requires non-exclusive permission to administer requests from third parties. Such requests will be handled in accordance with Note 6 above, and all correspondence will be conducted with the author, who is presumed to be authorized by the copyright owner to deal with such questions on the owner's behalf.
- 9 The Journal is registered with the Copyright Clearance Center (Massachusetts) and the Copyright Licensing Agency (London) and other Reproductive Rights Organizations. These non-profit making organizations offer centralized licensing arrangements for photocopying.

***Government employees***

- 10 If you are or were a US Government employee and the Article is made in that capacity, there is no copyright to assign, but you must sign the form to confirm the author warranties in Section A. If you are or were a UK Crown servant, or a Canadian or Australian government employee, and the Article is made in that capacity, the Article must be submitted for clearance by the Permanent Head of the Department concerned, and you must sign the form to confirm the author warranties in Section A. If the Article is determined to be copyrightable at a later date, then copyright and all rights included in this will be transferred to Blackwell Publishing.

Where an Article is Crown copyright, Blackwell Publishing must be informed as soon as it is accepted for publication so that the appropriate arrangements can be made with HMSO.

***Applicable Law***

- 11 The law governing this Agreement is the law of the United States and its various States, except where the Journal is published in another jurisdiction, in which case the law of that jurisdiction applies. Any dispute concerning this Agreement shall be subject to the non-exclusive jurisdiction of the courts of the United States and its various States, except where the Journal is published in another jurisdiction, in which case the courts of that jurisdiction shall determine any such dispute.

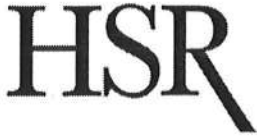

## REQUIRED INFORMATION AND FORM FOR ACCEPTED MANUSCRIPTS AT HSR [SEPT., 2009]

### *HSR Authorship Responsibility, Disclosures, and Acknowledgments*

#### **General instructions:**

The corresponding author is responsible for coordinating with each author to obtain all information disclosed on this form. This information is required to be submitted in the section on Manuscript Central labeled for the editors only, i.e., as supplementary files not for review, at the time of the first revision and should be updated as necessary for subsequent revisions or in response to queries from the editor-in-chief.

**Each author** must read and provide the information to the corresponding author on:

- (1) Authorship Responsibility, Criteria, and Contributions,
- (2) Financial Disclosures, and
- (3) Other Disclosures,

The **corresponding author** must complete and submit on behalf of all authors the summary form, affirming the information provided is accurate. The submitted form should contain the answers for the corresponding author on items 1-3 and summarize all authors' answers in the (4) Author and Other Contributors Section and (5) Acknowledgment/Disclosure Statement.

This form is available online at HSR.org *and* <http://mc.manuscriptcentral.com/hsr>. If necessary, it may be photocopied and distributed to coauthors or other contributors.

**NOTE:** We require this form to be completed before publication. The joint acknowledgement/disclosure statement and author matrix will be published electronically; the joint acknowledgement/disclosure statement [including any contributors to be acknowledged] will also appear in the print version. Each form will be approved by the editors to make sure that all necessary and relevant information that readers need to know to evaluate the work published in HSR has been reflected in the acknowledgement/disclosure paragraph; detailed disclosures will not be published.

The corresponding author should collect the disclosure information from each co-author and provide that information in the appropriate box below. The corresponding author should then prepare a draft joint acknowledgement/disclosure statement along with the author matrix. Each author should review and approve of the final joint statement and authorship information.

The wording of the acknowledgement/disclosure statement and author matrix may undergo some negotiation with the editors, either to eliminate some material that is not needed or to include some that should be disclosed. As only the corresponding author can upload information to Manuscript Central, he or she will coordinate the process. All authors should submit drafts of their disclosures electronically to the corresponding author. The corresponding author may submit them and a draft of the joint statement electronically at any time during our processing of the manuscript. This material will be reviewed for consistency and completeness when the manuscript is close to acceptance.

**Health Services Research  
Certification and Disclosures by Authors**

**Manuscript Number: HSR-** 13-0628

[After submitting your manuscript online, your manuscript is assigned a number that must be entered in the space above].

Corresponding Author: Momotazur Rahman

**Please fill in the following table: AUTHOR ORDER AND CONTACT INFORMATION**

| Authors, in preferred order for publication | Telephone Number | Fax Number | e-mail address             |
|---------------------------------------------|------------------|------------|----------------------------|
| Momotazur Rahman                            | 401 863 1275     |            | Momotazur_Rahman@brown.edu |
| Denise Tyler                                | 401-863-3894     |            | denise_tyler@brown.edu     |
| Kali S Thomas                               | 401-863-9036     |            | Kali_Thomas@brown.edu      |
| David C Grabowski                           | 617 432 3369     |            | grabowski@med.harvard.edu  |
| Vincent Mor                                 | 401-863-2959     |            | Vincent_Mor@brown.edu      |
|                                             |                  |            |                            |
|                                             |                  |            |                            |
|                                             |                  |            |                            |
|                                             |                  |            |                            |
|                                             |                  |            |                            |
|                                             |                  |            |                            |
|                                             |                  |            |                            |
|                                             |                  |            |                            |
|                                             |                  |            |                            |
|                                             |                  |            |                            |
|                                             |                  |            |                            |
|                                             |                  |            |                            |
|                                             |                  |            |                            |
|                                             |                  |            |                            |
|                                             |                  |            |                            |
|                                             |                  |            |                            |

**INSTRUCTIONS: EACH AUTHOR MUST READ SECTIONS 1-3 AND PROVIDE FULL DISCLOSURE TO THE CORRESPONDING AUTHOR. THE SUBMITTED FORM SHOULD PROVIDE INDIVIDUAL INFORMATION FOR THE CORRESPONDING AUTHOR AND SUMMARIZE ALL AUTHORS' INFORMATION.**

**1. Authorship Responsibility, Criteria, and Contributions.** Each author should meet all criteria below (A, B, C, and D) and should affirm his or her general and specific contributions to the corresponding author. The corresponding author should then complete the information for him/herself by checking the appropriate boxes below and summarize the information for all authors in section 4 and 5. This summary statement should be consistent with and reflect all significant disclosures of each of the individual authors. Research and manuscripts may depend critically on various individuals who do not meet all the criteria for authorship; they should be acknowledged as contributors in section 4 below.

- A. I certify that
- the manuscript represents valid work and that neither this manuscript nor one with substantially similar content in which I am an author has been published or is being considered for publication elsewhere, except as described in an attachment, and that copies of closely related manuscripts have been provided to the editors or HSR; and
  - [for papers with more than 1 author], I agree to allow the corresponding author to serve as the primary correspondent with the editorial office, to review the edited typescript and proof, and to make decisions regarding release of information in the manuscript to the media, federal agencies, or both; or,
  - [for papers for which I am the only author] I will be the corresponding author and agree to serve in the roles described above.

B. I have given final approval of the submitted manuscript and each of its revisions, if any.

C. I have participated sufficiently in the work to take public responsibility for (check 1 or 2 below)

1. the whole content.

2. part of the content: (fill in as appropriate)  
limited to

all but

D. To qualify for authorship, you must check at least 1 box for *each* of the 2 categories of contributions listed below. For examples of contributions that qualify for acknowledgment but not for authorship, see section 4 below.

**I have made substantial contributions to the intellectual content of the paper as described below.**

1. (check at least 1 of the 3 below)

- a. conception and design
- b. acquisition of data
- c. analysis and interpretation of data

2. (check at least 1 of 2 below)

- a. drafting of the manuscript
- b. critical revision of the manuscript for important intellectual content

**2. Financial Disclosure.** For the purposes of this disclosure and the one below, “conflicts of interest” include not only situations in which decisions and judgment have been influenced, but also those that may, if subsequently disclosed or uncovered, lead readers to question whether decisions or judgment may have been influenced by such situations. We anticipate that the vast majority of “conflicts,” if disclosed in advance, will have little bearing on a reader’s assessment of the research and no bearing on our decision to publish. Except in cases in which all the authors certify they have nothing to disclose, the corresponding author will submit a brief acknowledgment/disclosure of the conflicts of all the authors in Section 4.

Please check the appropriate boxes below (applies to the past five years and foreseeable future):

- a. I have no relevant financial interests pertaining to this manuscript.
- b. I certify that all my conflicts of interest, including specific financial interests and relationships and affiliations relevant to the subject matter or materials discussed in the manuscript (e.g., employment / affiliation, grants or funding, consultancies, honoraria, stock ownership or options, expert testimony, royalties, or patents filed, received, or pending), are disclosed in an attachment.
- c. I certify that all financial and material support (including those providing data or access to patients, interviewees, etc.) for this research and work are clearly identified in an acknowledgement/disclosure section to be published with the manuscript.
- d. I certify that I agree with the description in the Acknowledgements/Disclosures statement in Section 5 of any support for the project or conflicts of interest as they pertain to myself.

**3. Other Disclosures.** Aside from financial interests, there may be other real or potential conflicts that need to be disclosed. In particular, we are concerned about situations in which an external sponsor, provider of data, or other entity may be able to influence either an author's ability to publish or to shape what he or she seeks to publish. We are also concerned that an author, or organizations with which he or she is affiliated, may have taken certain positions relevant to the research that should be disclosed. We may require that such information be publicly acknowledged. For the purposes of this disclosure, the term "contractual right" includes not only formal contracts and memoranda of understanding with outside parties, but also the rights of your employer to review and or approve your publications. Please check the appropriate boxes below and provide the information requested:

- a. Sponsors and/or supporters of this research, e.g., organizations providing data, or supervisors within my own organization have:
  - i. a contractual right to review and approve the manuscript before submission or publication.
  - ii. a contractual right to review and comment on the manuscript within days, after which it can be submitted without constraint.
  - iii. no contractual rights to review the manuscript before submission, but there is a requirement that the sponsor/supporter be given a copy of the accepted manuscript prior to publication.
  - iv. no requirement for prior approval or notification, but I solicited feedback and/or plan to provide an advance copy as a courtesy.
  - v. the manuscript has not been reviewed or commented upon by the sponsor(s) and I have no plans to provide advance notification.
  - vi. this research did not have a sponsor as defined above.

If you checked any of the boxes i through iv, please indicate the organizations involved and the circumstances. (For example, some organizations require that manuscripts undergo internal peer review for comment, but an author may publish any findings he or she wishes.)



IN THE SUBMITTED FORM, THE CORRESPONDING AUTHOR SHOULD PROVIDE DETAILS FOR EACH AUTHOR [NAMED] WHO HAS CHECKED ANY BOX i THROUGH iv.

Please describe:

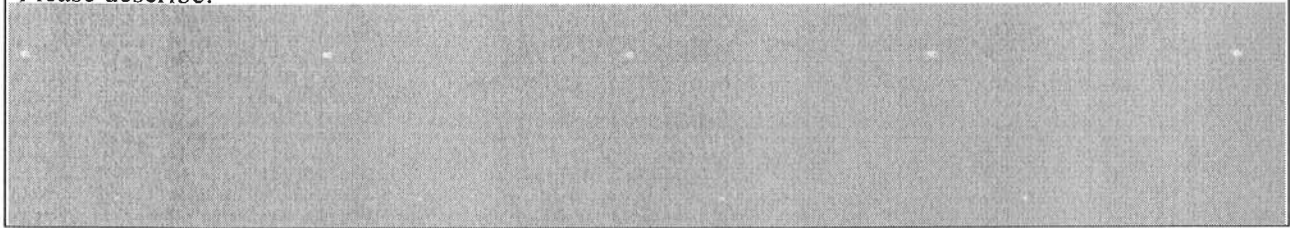

A contractual right by a sponsor, supporter, or employer to review and approve (and hence censor) a manuscript makes it appear to be a “work for hire” rather than research. On occasion such work may warrant publication in HSR, e.g., because it illustrates novel methods, but we will be reluctant to accept a manuscript with findings or conclusions that might be influenced by the ability of the sponsor to withhold permission to publish.

b. I have taken public stands (e.g., in print, media, expert witness, legislative testimony or other venues, with or without compensation) that are identified with a particular advocacy position relevant to the manuscript.

IN THE SUBMITTED FORM, THE CORRESPONDING AUTHOR SHOULD PROVIDE DETAILS FOR EACH AUTHOR [NAMED] WHO HAS CHECKED BOX b.

Please describe:

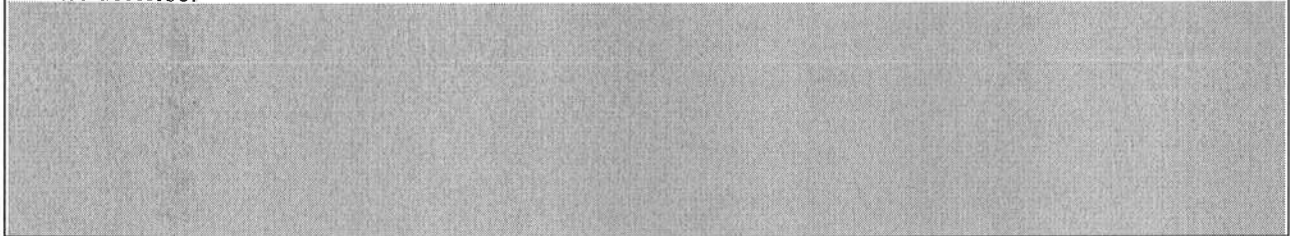

c. The organization with which I am currently (or was, at the time of the manuscript’s preparation) affiliated (as a spokesperson, board member, or similar prominent position) is identified with a particular advocacy position relevant to the manuscript.

IN THE SUBMITTED FORM, THE CORRESPONDING AUTHOR SHOULD PROVIDE DETAILS FOR EACH AUTHOR [NAMED] WHO HAS CHECKED BOX c.

Please describe:

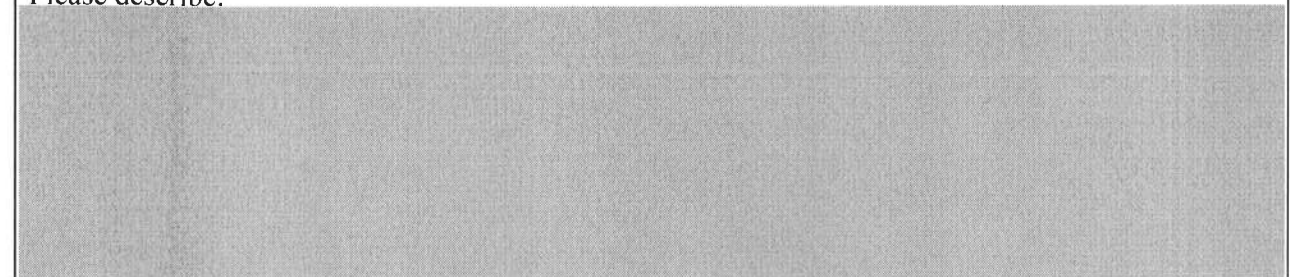

d. I certify I agree with the description in the Acknowledgements/Disclosures statement in Section 5 of disclosures as they pertain to myself.

**4.A. Author matrix.** Please complete the authorship matrix affirming which roles each author has fulfilled. To be listed as an author, persons should have made contributions in both of the shaded areas; all others should be acknowledged as contributors. In the box in 4.B., we invite you to name other contributors. In addition, you may use the box in 4.B. if you wish to name other kinds of contributions by authors.

Section 4 A. and B. will be made available in the electronic version of accepted manuscripts.

\*You may wish to copy the author’s names from the box on page 2.

| <b>Manuscript Number:</b><br>HSR-13-0628<br><br><b>Name of Each Author*</b> | <b>Each author must check at least one blue box showing important contributions to:</b> |                                                         |                                            | <b>&amp; check contributions in at least one orange box:</b> |                                                             |
|-----------------------------------------------------------------------------|-----------------------------------------------------------------------------------------|---------------------------------------------------------|--------------------------------------------|--------------------------------------------------------------|-------------------------------------------------------------|
|                                                                             | <b>Conception and design</b>                                                            | <b>Acquisition of data (arranging for or obtaining)</b> | <b>Analysis and interpretation of data</b> | <b>Drafting the manuscript</b>                               | <b>Critical revision for important intellectual content</b> |
| Momotazur Rahman                                                            | <input checked="" type="checkbox"/>                                                     | <input checked="" type="checkbox"/>                     | <input checked="" type="checkbox"/>        | <input checked="" type="checkbox"/>                          | <input checked="" type="checkbox"/>                         |
| Denise Tyler                                                                | <input checked="" type="checkbox"/>                                                     | <input type="checkbox"/>                                | <input checked="" type="checkbox"/>        | <input checked="" type="checkbox"/>                          | <input checked="" type="checkbox"/>                         |
| Kali S Thomas                                                               | <input type="checkbox"/>                                                                | <input type="checkbox"/>                                | <input checked="" type="checkbox"/>        | <input checked="" type="checkbox"/>                          | <input type="checkbox"/>                                    |
| David C Grabowski                                                           | <input type="checkbox"/>                                                                | <input checked="" type="checkbox"/>                     | <input checked="" type="checkbox"/>        | <input checked="" type="checkbox"/>                          | <input checked="" type="checkbox"/>                         |
| Vincent Mor                                                                 | <input checked="" type="checkbox"/>                                                     | <input checked="" type="checkbox"/>                     | <input checked="" type="checkbox"/>        | <input checked="" type="checkbox"/>                          | <input checked="" type="checkbox"/>                         |
|                                                                             | <input type="checkbox"/>                                                                | <input type="checkbox"/>                                | <input type="checkbox"/>                   | <input type="checkbox"/>                                     | <input type="checkbox"/>                                    |
|                                                                             | <input type="checkbox"/>                                                                | <input type="checkbox"/>                                | <input type="checkbox"/>                   | <input type="checkbox"/>                                     | <input type="checkbox"/>                                    |
|                                                                             | <input type="checkbox"/>                                                                | <input type="checkbox"/>                                | <input type="checkbox"/>                   | <input type="checkbox"/>                                     | <input type="checkbox"/>                                    |
|                                                                             | <input type="checkbox"/>                                                                | <input type="checkbox"/>                                | <input type="checkbox"/>                   | <input type="checkbox"/>                                     | <input type="checkbox"/>                                    |
|                                                                             | <input type="checkbox"/>                                                                | <input type="checkbox"/>                                | <input type="checkbox"/>                   | <input type="checkbox"/>                                     | <input type="checkbox"/>                                    |
|                                                                             | <input type="checkbox"/>                                                                | <input type="checkbox"/>                                | <input type="checkbox"/>                   | <input type="checkbox"/>                                     | <input type="checkbox"/>                                    |
|                                                                             | <input type="checkbox"/>                                                                | <input type="checkbox"/>                                | <input type="checkbox"/>                   | <input type="checkbox"/>                                     | <input type="checkbox"/>                                    |
|                                                                             | <input type="checkbox"/>                                                                | <input type="checkbox"/>                                | <input type="checkbox"/>                   | <input type="checkbox"/>                                     | <input type="checkbox"/>                                    |
|                                                                             | <input type="checkbox"/>                                                                | <input type="checkbox"/>                                | <input type="checkbox"/>                   | <input type="checkbox"/>                                     | <input type="checkbox"/>                                    |

**Section 4.B. Other Contributions**

Some research projects involve very extensive teams with many people who do not meet the criteria for authorship but who have contributed importantly to the work. The box below is designed to acknowledge other types of contributions. As appropriate, use this box to name other people who have made important contributions to the work reported in this manuscript. Please also name people who have played a significant role in preparing the manuscript but who are not listed as authors. NOTE: If you wish to acknowledge any of these contributors in print, please include their names and roles in the joint acknowledgment section below.

|                                                  |
|--------------------------------------------------|
| Please name contributors to be acknowledged for: |
| Statistical analysis                             |
|                                                  |
| Data collection (under supervision)              |
|                                                  |
| Interviewing (under supervision)                 |
|                                                  |
| Programming and data management                  |
|                                                  |
| Editing for presentation or style                |
|                                                  |
| Obtaining funding                                |
|                                                  |
| Administrative, technical, or material support   |
|                                                  |
| Supervision of research staff                    |
|                                                  |
| Other (specify)                                  |
|                                                  |

**INSTRUCTIONS: THE CORRESPONDING AUTHOR MUST FILL OUT SECTION 5.**

**5. Joint Acknowledgment/Disclosure Statement.** Please enter a 1-3 sentence statement that acknowledges all forms of financial and material support for the project, the roles of key individuals who should be recognized; (this may or may not extend to everyone listed as contributors). Please also include summary statements about what you feel are the conflicts of interests and disclosures without which some readers may feel that important relevant information is being withheld. The editors will determine whether these disclosures are sufficient or excessive and may return a revised version. All authors will need to approve the final version. As appropriate, please add at the end of your statement: 'Disclosures: None' or 'No Other Disclosures'.

Section 5 will be made available in both the electronic and print version of accepted manuscripts.

|                                                                                                                                                                          |
|--------------------------------------------------------------------------------------------------------------------------------------------------------------------------|
| <p>Joint Acknowledgement/Disclosure Statement:<br/>Acknowledgements: This work was supported by the National Institute of Aging Grants P01AG027296 (PI: Vincent Mor)</p> |
|--------------------------------------------------------------------------------------------------------------------------------------------------------------------------|

**The corresponding author should obtain permission to name all individuals named in an Acknowledgment or the Contributorship Section because readers may infer their endorsement of data and conclusions.**

**The corresponding author must check the box below to affirm his/her certification that:**

- all persons who have made substantial contributions to the work reported in this manuscript (e.g., data collection, analysis, or writing or editing assistance) but who do not fulfill the authorship criteria are named with their specific contributions in the Contributorship Box associated with the manuscript.
- all persons named in the Contributorship box have provided me with permission to be named.
- no other persons have made substantial contributions to this manuscript.
- all authors have approved the Joint Acknowledgement/Disclosure Statement intended for publication and the author matrix.

I, the corresponding author, certify that the above statements are true.

*Prof. Monotzer*

5/6/14

(Adapted, with permission, from the Journal of the American Medical Association, 2006)
